# Supplementary material
Source: ML conference proceedings conference paper supplement (https://proceedings.neurips.cc/paper_files/paper/2016/hash/40008b9a5380fcacce3976bf7c08af5b-Abstract.html)
Supplement: Supplementary file [file 40008b9a5380fcacce3976bf7c08af5b-Supplemental.zip]

# Supplemental Materials for Paper 340

## Neurally-Guided Procedural Models: Amortized Inference for Procedural Graphics Programs using Neural Networks

### 1 Derivation of Equation 1

$$\begin{aligned}
& \min_{\theta} D_{\text{KL}}(P_{\text{CM}} || P_{\text{GM}}) \\
&= \min_{\theta} \mathbb{E}_{P(\mathbf{c})} \left[ \mathbb{E}_{P_{\text{CM}}(\mathbf{x}|\mathbf{c})} \left[ \log \frac{P_{\text{CM}}(\mathbf{x}|\mathbf{c})}{P_{\text{GM}}(\mathbf{x}|\mathbf{c}; \theta)} \right] \right] \\
&= \min_{\theta} \mathbb{E}_{P(\mathbf{c})} \left[ \mathbb{E}_{P_{\text{CM}}(\mathbf{x}|\mathbf{c})} \left[ \log P_{\text{CM}}(\mathbf{x}|\mathbf{c}) - \log P_{\text{GM}}(\mathbf{x}|\mathbf{c}; \theta) \right] \right] \\
&= \max_{\theta} \mathbb{E}_{P(\mathbf{c})} \left[ \mathbb{E}_{P_{\text{CM}}(\mathbf{x}|\mathbf{c})} \left[ \log P_{\text{GM}}(\mathbf{x}|\mathbf{c}; \theta) - \log P_{\text{CM}}(\mathbf{x}|\mathbf{c}) \right] \right] \\
&= \max_{\theta} \mathbb{E}_{P(\mathbf{c})} \left[ \mathbb{E}_{P_{\text{CM}}(\mathbf{x}|\mathbf{c})} \left[ \log P_{\text{GM}}(\mathbf{x}|\mathbf{c}; \theta) \right] \right] \\
&\approx \max_{\theta} \frac{1}{N} \sum_{s=1}^N \log P_{\text{GM}}(\mathbf{x}_s | \mathbf{c}_s; \theta) \quad \mathbf{x}_s \sim P_{\text{CM}}(\mathbf{x}|\mathbf{c}), \mathbf{c}_s \sim P(\mathbf{c})
\end{aligned}$$

In the second-to-last step, the  $\log P_{\text{CM}}(\mathbf{x}|\mathbf{c})$  term is dropped because it does not depend on  $\theta$ . In the last step, we approximate the expectations with an average over a finite set of samples.

## 2 Additional Results

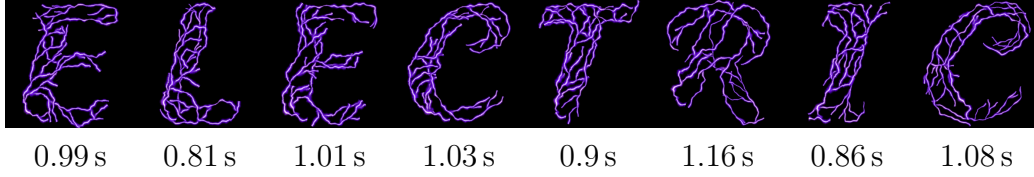

Figure 1: Targeting letter shapes with a neurally-guided procedural lightning program. Generated using SMC with 10 particles; compute time required is shown below each letter. Best viewed on a high-resolution display.

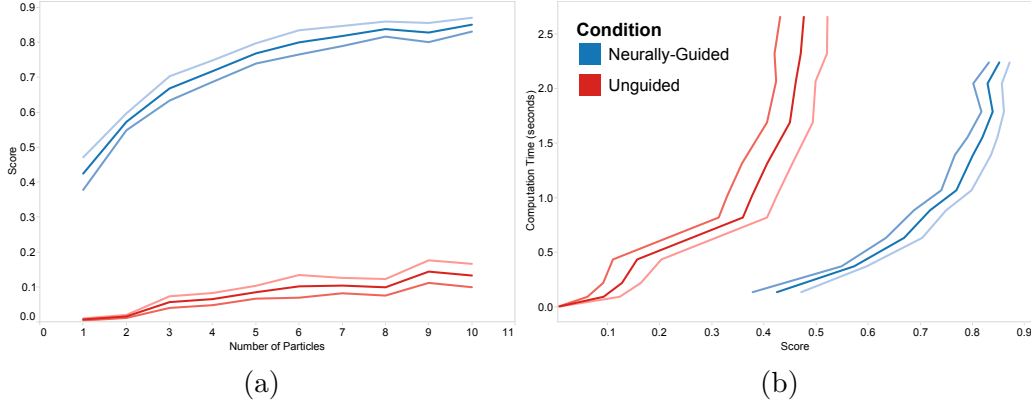

Figure 2: Performance comparison for the circuit design problem (section 4.3 in the main paper). “Score” is median normalized score (i.e. argument one to the Gaussian in Equation 4 of the main paper), averaged over 50 runs. The neurally-guided version achieves significantly higher average scores than the unguided version given the same number of particles or the same amount of compute time.

| Target                                                                              | Reference                                                                                                  | Guided                                                                                                   | Unguided<br>(Equal $N$ )                                                                                  | Unguided<br>(Equal Time)                                                                                   |
|-------------------------------------------------------------------------------------|------------------------------------------------------------------------------------------------------------|----------------------------------------------------------------------------------------------------------|-----------------------------------------------------------------------------------------------------------|------------------------------------------------------------------------------------------------------------|
|    | <br>$N = 600$ , 38.68 s   | <br>$N = 5$ , 0.86 s    | <br>$N = 5$ , 0.09 s    | <br>$N = 30$ , 0.83 s   |
|    | <br>$N = 600$ , 33.5 s    | <br>$N = 10$ , 1.23 s   | <br>$N = 10$ , 0.14 s   | <br>$N = 40$ , 1.28 s   |
|   | <br>$N = 600$ , 25.55 s  | <br>$N = 15$ , 1.75 s  | <br>$N = 15$ , 0.23 s  | <br>$N = 50$ , 1.73 s  |
|  | <br>$N = 600$ , 20.76 s | <br>$N = 10$ , 0.81 s | <br>$N = 10$ , 0.15 s | <br>$N = 40$ , 0.85 s |
|  | <br>$N = 600$ , 25.5 s  | <br>$N = 10$ , 1.04 s | <br>$N = 10$ , 0.14 s | <br>$N = 40$ , 1.05 s |

Figure 3: Additional shape matching results (section 4.2 in the main paper).
